# Supplementary material for: Comparison of Four Real-time Polymerase Chain Reaction Assays for the Detection of SARS-CoV-2 on respiratory samples from Tunja, Boyacá - Colombia
Source: Preprints.org preprint supplement (doi:10.20944/preprints202208.0392.v1), 2022-08-23
Supplement: Supplementary file 1 [file supplementary]

## Sheet: Table S1
Table S1. Primary data obtained from Four Real-time Polymerase Chain Reaction Assays for the Detection of SARS-CoV-2 on respiratory samples from Tunja, Boyacá - Colombia
Patients				Diagnostic accuracy of GeneFinderTM COVID-19 Plus RealAmp (In Vitro diagnostic) (GF-TM)					Berlin modified protocol (BM)				One-Step Real-Time RT-PCR (Vitro Master diagnostica) (O-S RT-qPCR)				Gold standard Berlin protocol (Berlin Charite Probe One-Step RT-qPCR Kit, New England Biolabs) (BR)
ITEM	Age	ID Sample	Sex	Gen RdRP	Gen E	Gen N	RNAasP	RESULT	GEN E	GEN N	RNASA P	RESULT	RNASP	E	N	RESULT	GEN E	RNASAP	RESULT
1	31	26500103	MALE	0	0	0	27.55	NEG	0	0	28.42	NEG	29.10	0	0	NEG	0	23.86	NEG
2	77	26500104	MALE	0	0	0	26.27	NEG	0	0	27.33	NEG	29.74	0	0	NEG	0	23.71	NEG
3	33	26500105	MALE	0	0	0	28.22	NEG	0	0	28.92	NEG	28.08	0	0	NEG	0	25.89	NEG
4	45	26500106	FEMALE	0	0	0	28.01	NEG	0	0	28.59	NEG	28.19	0	0	NEG	0	28.55	NEG
5	70	26500107	MALE	0	0	0	24.12	NEG	0	0	25.75	NEG	27.49	0	0	NEG	0	24.59	NEG
6	66	26500108	FEMALE	0	0	0	23.92	NEG	0	0	24.92	NEG	27.68	0	0	NEG	0	28.03	NEG
7	74	26500109	MALE	0	0	0	26.06	NEG	0	0	27.41	NEG	30.18	0	0	NEG	0	28.26	NEG
8	37	26500110	FEMALE	0	0	0	27.41	NEG	0	0	28.64	NEG	22.60	0	0	NEG	0	26.52	NEG
9	65	26500111	FEMALE	34.14	32.29	31.44	26.11	POS	31.58	32.11	26.83	POS	17.19	16.72	30.18	POS	29.2	30.48	POS
10	13	26500112	MALE	0	0	0	28.07	NEG	0	0	29.10	NEG	29.46	30.51	28.34	POS	0	28.42	NEG
11	41	26500113	FEMALE	0	0	0	29.27	NEG	0	0	29.74	NEG	22.60	0	0	NEG	0	27.33	NEG
12	46	26500114	MALE	0	0	0	27.07	NEG	0	0	28.08	NEG	23.80	0	0	NEG	0	28.92	NEG
13	43	26500115	MALE	0	0	0	27.33	NEG	0	0	28.19	NEG	23.80	0	0	NEG	0	28.59	NEG
14	23	26500116	FEMALE	39.47	0	31.69	26.28	POS	33.47	34.13	27.49	POS	29.46	30.51	28.34	POS	22.5	29.51	POS
15	72	26500117	MALE	0	0	0	26.48	NEG	0	0	27.68	NEG	22.83	0	0	NEG	0	24.59	NEG
16	59	26500119	MALE	17.38	15.35	15.42	28.22	POS	17.19	16.72	30.18	POS	0	20.56	23.05	POS	20.21	30.32	POS
17	65	26500120	FEMALE	31.47	29.94	29.63	27.32	POS	29.46	30.51	28.34	POS	16.84	17.04	27.10	POS	39.63	31.13	POS
18	34	26500121	FEMALE	18.93	15.72	16.32	26.62	POS	14.40	16.81	25.35	POS	29.06	30.63	27.43	POS	19.38	28.55	POS
19	62	26500122	MALE	0	0	35.25	29.76	POS	36.18	0	30.14	POS	17.48	17.87	25.15	POS	36.92	32.14	POS
20	38	26500144	MALE	36.68	0	31.37	26.38	POS	34.65	32.05	27.17	POS	0	38.16	37.55	POS	37.27	29.77	POS
21	49	26500150	FEMALE	36.69	0	30.12	25.26	POS	0	33.31	26.19	POS	31.58	32.11	26.83	POS	21.3	26.17	POS
22	75	26500154	FEMALE	25.62	24.30	24.12	24.62	POS	28.07	27.16	26.11	POS	33.47	34.13	27.49	POS	22.6	26.5	POS
23	52	26500155	MALE	39.66	0	34.71	26.75	POS	36.03	36.30	28.09	POS	17.19	16.72	30.18	POS	38.26	30.25	POS
24	30	26500167	MALE	0	0	36.94	25.05	POS	0	37.60	26.95	POS	29.46	30.51	28.34	POS	37.96	27.74	POS
25	44	26500172	MALE	24.56	22.78	22.49	25.38	POS	23.48	24.01	25.78	POS	41.63	33.27	28.23	POS	28.30	30.17	POS
26	26	26500175	MALE	22.47	18.85	22.06	28.55	POS	18.47	20.74	27.95	POS	31.50	31.44	29.20	POS	23.30	31.53	POS
27	55	26500191	MALE	41.00	0	34.83	24.00	POS	0	39.86	25.59	POS	31.03	28.96	26.74	POS	35.56	28.50	POS
28	61	26500118	FEMALE	0	0	0	23.77	NEG	0	0	25.03	NEG	23.64	22.20	26.83	POS	0	28.41	NEG
29	72	26500123	FEMALE	0	0	0	25.85	NEG	0	0	26.19	NEG	32.91	30.62	22.62	POS	0	27.04	NEG
30	81	26500196	FEMALE	0	0	0	23.79	NEG	0	0	29.31	NEG	27.24	20.94	30.88	POS	0	26.00	NEG
31	32	26500197	FEMALE	0	0	0	21.55	NEG	0	0	24.62	NEG	24.49	21.83	29.10	POS	0	27.52	NEG
32	30	26500198	MALE	0	0	0	22.96	NEG	0	0	27.73	NEG	24.49	0	0	NEG	0	26.87	NEG
33	20	26500200	FEMALE	0	0	0	22.04	NEG	0	0	27.55	NEG	23.64	0	0	NEG	0	27.19	NEG
34	40	26500201	FEMALE	23.17	21.27	21.57	21.42	POS	24.89	24.82	27.40	POS	35.36	37.70	26.59	POS	25.16	28.70	POS
35	37	26500202	FEMALE	0	0	0	23.46	NEG	0	0	29.59	NEG	37.15	33.61	29.26	POS	0	28.16	NEG
36	58	26500203	MALE	0	0	0	20.13	NEG	0	0	24.42	NEG	30.09	28.87	26.73	POS	0	26.02	NEG
37	37	26500204	MALE	0	0	0	23.58	NEG	0	0	28.67	NEG	28.40	25.98	29.15	POS	0	27.80	NEG
38	27	26500205	FEMALE	0	0	0	22.92	NEG	0	0	29.31	NEG	33.90	30.70	29.33	POS	0	28.61	NEG
39	62	26500206	MALE	28.49	27.82	26.98	21.44	POS	30.16	30.41	27.37	POS	29.28	28.03	29.13	POS	34.88	29.63	POS
40	18	26500207	MALE	0	0	0	22.37	NEG	0	0	27.82	NEG	24.39	0	0	NEG	0	23.86	NEG
41	72	26500208	MALE	18.32	16.44	17.43	17.85	POS	17.28	20.19	25.24	POS	31.55	31.17	29.20	POS	22.92	27.50	POS
42	64	26500209	MALE	0	0	0	24.27	NEG	0	0	29.50	NEG	24.39	0	0	NEG	0	25.13	NEG
43	73	26500210	FEMALE	0	0	0	23.57	NEG	0	0	28.23	NEG	27.72	0	0	NEG	0	26.30	NEG
44	51	26500211	MALE	0	0	0	22.78	NEG	0	0	27.62	NEG	25.55	0	0	NEG	0	27.76	NEG
45	36	26500212	MALE	0	0	0	22.37	NEG	0	0	27.68	NEG	27.82	0	0	NEG	0	23.25	NEG
46	34	26500213	MALE	0	0	0	22.85	NEG	0	0	28.03	NEG	28.44	0	0	NEG	0	26.55	NEG
47	24	26500214	FEMALE	0	0	0	23.24	NEG	0	0	28.37	NEG	28.16	0	0	NEG	0	26.37	NEG
48	64	26500215	FEMALE	0	0	0	22.95	NEG	0	0	28.33	NEG	27.57	0	0	NEG	0	29.50	NEG
49	6	26500216	FEMALE	0	0	0	21.75	NEG	0	0	27.72	NEG	26.70	0	0	NEG	0	28.23	NEG
50	17	26500217	FEMALE	0	0	0	19.7	NEG	0	0	25.55	NEG	28.23	0	0	NEG	0	27.62	NEG
51	63	26500218	FEMALE	0	0	0	22.35	NEG	0	0	27.82	NEG	27.62	0	0	NEG	0	27.68	NEG
52	70	26500219	MALE	0	0	0	22.87	NEG	0	0	28.44	NEG	27.68	0	0	NEG	0	28.03	NEG
53	76	26500220	FEMALE	0	0	0	22.28	NEG	0	0	28.16	NEG	28.03	0	0	NEG	0	28.37	NEG
54	55	26500221	MALE	0	0	0	22.35	NEG	0	0	27.57	NEG	28.37	0	0	NEG	0	28.33	NEG
55	40	26500222	FEMALE	0	0	0	21.67	NEG	0	0	26.70	NEG	22.60	0	0	NEG	0	24.59	NEG
56	21	26500227	FEMALE	39.4		36.87	22.82	POS	0	0	29.39	NEG	31.88	29.08	26.63	POS	0	29.64	NEG
57	41	26500266	MALE	34.48	37.93	33.18	22.55	POS	35.36	37.70	26.59	POS	31.55	31.17	29.20	POS	37.98	28.88	POS
58	25	1095899	FEMALE	0	0	0	28.94	NEG	0	0	29.20	NEG	29.72	28.43	26.27	POS	0	23.86	NEG
59	1	1096154	MALE	23.80	20.50	31.41	28.49	POS	37.15	33.61	29.26	POS	22.83	22.00	26.35	POS	35.62	27.32	POS
60	20	1096342	MALE	22.60	21.25	34.39	28.62	POS	0	0	29.28	NEG	37.16	29.55	22.47	POS	0	23.86	NEG
61	38	1096449	MALE	28.52	27.22	30.76	26.52	POS	30.09	28.87	26.73	POS	23.80	20.50	30.06	POS	30.01	25.46	POS
62	25	1096470	FEMALE	22.07	20.56	31.64	28.64	POS	28.40	25.98	29.15	POS	22.60	21.25	27.97	POS	28.63	28.11	POS
63	23	1096517	FEMALE	22.90	21.26	30.49	29.03	POS	33.90	30.70	29.33	POS	16.84	17.04	27.10	POS	34.01	30.49	POS
64	19	1097473	MALE	0	0	0	28.18	NEG	0	0	28.04	NEG	29.06	30.63	27.43	POS	0	25.46	NEG
65	48	1097016	FEMALE	23.64	22.20	31.70	29.04	POS	29.28	28.03	29.13	POS	17.48	17.87	25.15	POS	36.17	27.84	POS
66	30	1097077	FEMALE	32.91	30.62	36.04	28.35	POS	0	34.93	28.05	POS	22.67	34.62	29.01	POS	0	24.59	NEG
67	20	1097291	FEMALE	27.24	20.94	34.98	22.49	POS	0	0	27.80	NEG	22.60	32.02	25.47	POS	0	25.13	NEG
68	65	1097300	MALE	27.24	20.94	33.2	23.07	POS	35.25	32.36	28.05	POS	23.80	32.59	24.59	POS	39.09	28.05	POS
69	50	1097324	FEMALE	39.54	36.69	31.69	29.19	POS	31.55	31.17	29.20	POS	26.14	25.86	24.05	POS	33.56	31.58	POS
70	24	1097348	FEMALE	0	35.88	32.07	25.92	POS	29.72	28.43	26.27	POS	23.64	35.18	26.46	POS	31.36	26.96	POS
71	43	1097377	FEMALE	24.77	21.51	22.24	27.04	POS	22.83	22.00	26.35	POS	17.48	36.04	25.41	POS	22.71	27.17	POS
72	1	1097380	MALE	25.11	21.84	37.59	22.06	POS	37.16	29.55	22.47	POS	35.25	32.36	28.05	POS	0	25.07	NEG
73	42	1097388	FEMALE	27.41	28.18	23.24	30.00	POS	23.80	20.50	30.06	POS	31.55	31.17	29.20	POS	26.39	30.34	POS
74	18	1097389	MALE	27.90	25.05	23.87	29.01	POS	22.60	21.25	27.97	POS	29.72	28.43	26.27	POS	23.01	26.69	POS
75	20	1097390	FEMALE	0	0	0	29.16	NEG	0	0	28.56	NEG	22.83	22.00	26.35	POS	0	32.36	NEG
76	19	1097393	MALE	0	0	0	30.28	NEG	0	0	30.45	NEG	37.16	29.55	22.47	POS	0	31.17	NEG
77	17	1097395	MALE	0	0	0	30.00	NEG	0	0	29.42	NEG	23.80	20.50	30.06	POS	0	28.43	NEG
78	21	1097397	FEMALE	31.66	33.20	29.12	29.85	POS	28.52	27.22	29.46	POS	22.60	21.25	27.97	POS	30.60	29.63	POS
79	15	1097411	MALE	28.43	25.90	23.63	27.75	POS	22.07	20.56	27.14	POS	30.06	27.57	29.80	POS	25.16	27.73	POS
80	38	1097438	MALE	30.07	26.63	26.35	29.10	POS	22.90	21.26	27.45	POS	24.76	21.29	28.10	POS	25.41	25.60	POS
81	15	1097443	FEMALE	0	0	36.50	25.74	POS	0	34.06	26.30	POS	23.96	21.50	28.15	POS	39.19	26.74	POS
82	23	1097465	MALE	0	0	0	24.56	NEG	0	0	25.16	NEG	23.80	34.77	26.50	POS	0	29.13	NEG
83	22	1097468	MALE	0	0	0	26.68	NEG	0	0	26.47	NEG	24.59	0	0	NEG	0	28.05	NEG
84	24	1097469	MALE	0	0	0	30.00	NEG	0	0	29.85	NEG	25.13	0	0	NEG	0	27.80	NEG
85	20	1097471	MALE	0	0	0	27.80	NEG	0	0	27.32	NEG	28.05	0	0	NEG	0	28.05	NEG
86	21	1097478	MALE	0	0	0	27.87	NEG	0	0	27.93	NEG	31.58	0	0	NEG	0	29.20	NEG
87	60	1097480	MALE	0	0	0	29.97	NEG	0	0	29.54	NEG	26.96	0	0	NEG	0	26.27	NEG
88	41	1097483	MALE	0	0	0	29.14	NEG	0	0	28.72	NEG	27.17	0	0	NEG	0	26.35	NEG
89	68	1097502	FEMALE	0	0	0	26.50	NEG	0	0	27.05	NEG	25.07	0	0	NEG	0	22.47	NEG
90	34	1097528	MALE	29.01	28.95	25.46	28.43	POS	24.05	21.45	27.87	POS	31.03	28.96	26.74	POS	25.65	29.55	POS
91	45	1097532	FEMALE	0	0	36.80	26.95	POS	0	35.73	27.00	POS	0	35.92	39.18	POS	36.98	29.08	POS
92	53	1097537	MALE	27.03	27.99	22.96	27.64	POS	24.39	20.01	27.56	POS	22.67	23.19	24.27	POS	25.30	28.85	POS
93	14	1097538	MALE	40.96	0	32.69	27.16	POS	34.97	32.91	27.24	POS	19.28	20.30	28.72	POS	37.59	29.12	POS
94	27	1097545	MALE	0	0	0	29.17	NEG	0	0	29.16	NEG	35.07	35.44	23.48	POS	0	28.73	NEG
95	66	1097546	MALE	0	0	0	28.39	NEG	0	0	28.44	NEG	27.80	0	0	NEG	0	28.63	NEG
96	61	1097547	MALE	0	0	0	28.65	NEG	0	0	28.59	NEG	28.05	0	0	NEG	0	29.36	NEG
97	22	1097549	FEMALE	0	0	0	28.84	NEG	0	0	29.37	NEG	29.20	0	0	NEG	0	29.01	NEG
98	29	1097555	MALE	0	0	0	28.18	NEG	0	0	28.67	NEG	26.27	0	0	NEG	0	28.92	NEG
99	19	1097558	FEMALE	0	0	0	29.02	NEG	0	0	28.74	NEG	26.35	0	0	NEG	0	29.37	NEG
100	14	1097559	MALE	0	0	0	29.24	NEG	0	0	29.28	NEG	22.47	0	0	NEG	0	28.89	NEG
101	40	1097560	FEMALE	0	0	0	29.11	NEG	0	0	28.72	NEG	30.06	0	0	NEG	0	31.36	NEG
102	24	1097561	MALE	0	0	0	30.60	NEG	0	0	31.21	NEG	27.97	0	0	NEG	0	28.04	NEG
103	11	1097562	FEMALE	0	0	0	28.13	NEG	0	0	27.70	NEG	28.56	0	0	NEG	0	29.27	NEG
104	64	1097564	FEMALE	0	0	0	29.44	NEG	0	0	29.07	NEG	30.45	0	0	NEG	0	30.88	NEG
105	53	1097569	FEMALE	24.15	22.40	22.17	30.20	POS	22.64	22.04	29.44	POS	29.72	28.43	26.27	POS	32.29	32.08	POS
106	35	1097570	MALE	28.49	29.46	27.08	28.36	POS	31.43	28.67	30.40	POS	22.60	21.25	27.97	POS	37.32	31.43	POS
107	58	1097572	FEMALE	36.89	34.11	31.09	30.51	POS	32.45	30.01	30.90	POS	30.06	27.57	29.80	POS	0	32.16	NEG
108	28	1097579	FEMALE	0	0	36.42	30.40	POS	0	36.22	30.15	POS	24.39	20.01	27.56	POS	38.44	32.14	POS
109	57	1097585	FEMALE	0	0	0	28.75	NEG	0	0	29.10	NEG	23.64	0	0	NEG	0	23.86	NEG
110	49	1097590	MALE	28.19	25.13	24.35	24.42	POS	32.11	28.40	29.02	POS	0	36.58	39.34	POS	37.59	28.13	POS
111	40	1097603	FEMALE	43.23	0	35.30	27.07	POS	38.98	33.15	27.20	POS	0	0	0	NEG	33.51	27.47	POS
112	24	1097608	FEMALE	22.39	20.75	19.69	20.39	POS	19.05	17.62	24.31	POS	32.37	30.38	29.57	POS	22.01	26.21	POS
113	54	1097609	MALE	0	0	0	27.70	NEG	0	0	27.87	NEG	35.98	33.80	29.96	POS	0	22.47	NEG
114	46	1097614	FEMALE	25	21.39	20.87	23.84	POS	22.79	22.63	29.17	POS	28.03	26.85	31.24	POS	22.62	29.54	POS
115	17	1097618	MALE	0	0	0	26.68	NEG	0	0	26.60	NEG	25.15	22.91	30.02	POS	0	23.25	NEG
116	31	1097628	MALE	0	0	0	27.12	NEG	0	0	27.33	NEG	25.60	25.43	29.19	POS	0	20.01	NEG
117	57	1097638	MALE	28.13	28.75	25.42	26.86	POS	24.27	21.34	26.52	POS	32.11	28.40	29.02	POS	21.53	28.54	POS
118	74	1097643	MALE	37.14	35.42	27.6	25.32	POS	29.05	26.66	29.42	POS	38.98	33.15	27.20	POS	24.39	20.01	POS
119	30	1097654	FEMALE	35.23	29.36	27.56	24.88	POS	30.54	30.42	29.57	POS	30.25	26.03	26.30	POS	40.58	27.17	POS
120	24	1097681	MALE	0	0	0	27.75	NEG	0	0	27.66	NEG	24.16	20.11	25.66	POS	0	29.02	NEG
121	42	7174738	MALE	0	0	0	27.17	NEG	0	0	27.42	NEG	22.83	0	0	NEG	0	27.20	NEG
122	29	8600013	FEMALE	29.70	28.44	27.15	25.90	POS	25.89	23.89	25.68	POS	28.49	25.44	25.98	POS	26.02	28.73	POS
123	30	10140904	FEMALE	0	0	35.65	31.62	POS	34.07	33.60	30.90	POS	0	35.45	37.15	POS	35.10	31.77	POS
124	70	10140927	MALE	25.11	21.71	34.83	24.58	POS	34.67	34.81	28.56	POS	0	36.56	0	POS	37.35	27.40	POS
125	14	10140951	MALE	30.98	30.00	28.89	26.71	POS	28.39	27.35	26.39	POS	22.60	0	0	NEG	31.15	27.40	POS
126	38	10140952	FEMALE	31.88	30.33	29.52	27.86	POS	26.76	26.13	27.54	POS	0	26.46	29.03	POS	26.58	28.19	POS
127	41	10140953	MALE	33.14	33.00	29.27	26.28	POS	28.49	25.44	25.98	POS	0	30.49	33.56	POS	28.56	27.61	POS
128	26	10140965	FEMALE	29.46	28.77	26.17	25.78	POS	22.58	19.65	25.21	POS	0	24.46	26.81	POS	22.64	27.74	POS
129	66	10140970	FEMALE	0	0	36.97	27.27	POS	0	35.30	27.27	POS	0	0	0	NEG	40.57	29.85	POS
130	60	10140975	MALE	0	0	0	29.67	NEG	0	0	30.16	NEG	23.64	0	0	NEG	0	22.47	NEG
131	32	10140995	MALE	30.87	30.01	28.30	30.31	POS	23.78	22.72	28.43	POS	22.67	0	0	NEG	26.76	26.13	POS
132	62	10244288	FEMALE	0	0	0	26.16	NEG	0	0	26.53	NEG	23.96	0	0	NEG	0	23.25	NEG
133	5	10244657	FEMALE	34.07	33.60	31.09	28.79	POS	32.37	30.38	29.57	POS	0	32.41	35.21	POS	32.33	28.71	POS
134	64	10244774	FEMALE	34.67	34.81	33.64	29.21	POS	35.98	33.80	29.96	POS	0	34.76	37.22	POS	36.19	30.31	POS
135	56	10244827	FEMALE	28.39	27.35	29.85	30.61	POS	28.03	26.85	31.24	POS	0	29.45	32.49	POS	30.05	29.58	POS
136	17	10244828	MALE	26.76	26.13	28.64	29.71	POS	25.15	22.91	30.02	POS	0	27.07	30.26	POS	27.67	29.01	POS
137	26	10244891	FEMALE	30.79	27.43	28.13	33.40	POS	25.60	25.43	29.19	POS	23.96	0	0	NEG	19.39	27.73	POS
138	32	1097574	FEMALE	0	0	0	30.91	NEG	0	0	32.15	NEG	23.80	0	0	NEG	0	23.86	NEG
139	22	10244893	FEMALE	25.87	22.69	20.72	31.37	POS	20.83	19.39	27.73	POS	0	23.90	25.52	POS	23.53	28.95	POS
140	73	10244938	FEMALE	33.17	30.39	28.55	26.42	POS	26.18	24.60	26.46	POS	0	28.05	31.32	POS	27.55	28.90	POS
141	60	10244989	FEMALE	0	0	0	26.41	NEG	0	0	26.67	NEG	26.13	0	0	NEG	0	29.84	NEG
142	25	10244991	MALE	0	0	0	25.46	NEG	0	0	25.87	NEG	23.25	0	0	NEG	0	30.14	NEG
143	62	10244993	MALE	0	0	0	26.65	NEG	0	0	26.58	NEG	28.71	0	0	NEG	0	32.52	NEG
144	25	10245002	MALE	0	0	0	30.04	NEG	0	0	30.01	NEG	30.31	0	0	NEG	0	30.85	NEG
145	50	10245062	MALE	26.85	24.43	22.57	23.28	POS	26.08	24.49	28.01	POS	0	28.04	30.33	POS	27.45	28.13	POS
146	45	10245065	FEMALE	32.67	28.37	27.6	21.78	POS	29.86	28.57	26.09	POS	0	33.24	35.81	POS	33.68	30.27	POS
147	80	18704702	MALE	0	0	0	27.59	NEG	0	0	27.52	NEG	22.83	0	0	NEG	0	23.86	NEG
148	40	18704730	MALE	32.01	31.15	28.55	31.22	POS	25.09	23.05	30.12	POS	27.50	24.38	26.01	POS	33.60	30.90	POS
149	14	18704734	MALE	0	0	0	24.53	NEG	0	0	24.96	NEG	35.38	34.10	31.22	POS	34.81	28.56	NEG
150	49	32002584	MALE		22.91	34.99	24.44	POS	37.94	35.61	29.24	POS	16.84	36.02	29.03	POS	27.35	26.39	POS
151	46	40202238	MALE	0	25.43	29.41	27.70	POS	36.96	33.04	28.32	POS	28.99	27.71	26.38	POS	26.13	27.54	POS
152	20	10140896	MALE	0	19.39	34.74	27.77	POS	34.63	30.85	27.46	POS	27.14	25.29	26.61	POS	19.39	27.73	POS
