# Supplementary material for: Comparison of Four Real-time Polymerase Chain Reaction Assays for the Detection of SARS-CoV-2 on respiratory samples from Tunja, Boyacá - Colombia
Source: Preprints.org preprint supplement (doi:10.20944/preprints202208.0392.v1), 2022-08-23
Supplement: Supplementary file 3 [file TableS2.xlsx]

## Sheet: Table S2
Table S2. Description of the concordant and discordant results found in 152 samples analyzed. A. Concordat results of positive samples between the kits used and their amplification Ct, B. Concordant results of negative samples between the different kits used, C. Discordant results between the kits used.
A.										B.										C.
ITEM	GF-TM			BM		BR	O-S RT-qRT-PCR			ITEM	GF-TM			BM		BR	O-S RT-qRT-PCR			ITEM	GF-TM			BM		BR	O-S RT-qRT-PCR
	Gen RdRP	Gen E	Gen N	Gen E	Gen N	Gen E	E	N			Gen RdRP	Gen E	Gen N	Gen E	Gen N	Gen E	E	N			Gen RdRP	Gen E	Gen N	Gen E	Gen N	Gen E	E	N
9	34.14	32.29	31.44	31.58	32.11	29.2	16.72	30.18		1	NA	NA	NA	NA	NA	NA	NA	NA		111	43.23	NA	35.30	38.98	33.15	33.51	NA	NA
16	17.38	15.35	15.42	17.19	16.72	20.21	20.56	23.05		2	NA	NA	NA	NA	NA	NA	NA	NA		125	30.98	30.00	28.89	28.39	27.35	31.15	NA	NA
17	31.47	29.94	29.63	29.46	30.51	39.63	17.04	27.10		3	NA	NA	NA	NA	NA	NA	NA	NA		129	NA	NA	36.97	NA	35.30	40.57	NA	NA
18	18.93	15.72	16.32	14.40	16.81	19.38	30.63	27.43		4	NA	NA	NA	NA	NA	NA	NA	NA		131	30.87	30.01	28.30	23.78	22.72	26.76	NA	NA
22	25.62	24.30	24.12	28.07	27.16	22.6	34.13	27.49		5	NA	NA	NA	NA	NA	NA	NA	NA		137	30.79	27.43	28.13	25.60	25.43	19.39	NA	NA
34	23.17	21.27	21.57	24.89	24.82	25.16	37.70	26.59		6	NA	NA	NA	NA	NA	NA	NA	NA		10	NA	NA	NA	NA	NA	NA	30.51	28.34
25	24.56	22.78	22.49	23.48	24.01	28.30	33.27	28.23		7	NA	NA	NA	NA	NA	NA	NA	NA		28	NA	NA	NA	NA	NA	NA	22.20	26.83
26	22.47	18.85	22.06	18.47	20.74	23.30	31.44	29.20		8	NA	NA	NA	NA	NA	NA	NA	NA		29	NA	NA	NA	NA	NA	NA	30.62	22.62
39	28.49	27.82	26.98	30.16	30.41	34.88	28.03	29.13		11	NA	NA	NA	NA	NA	NA	NA	NA		30	NA	NA	NA	NA	NA	NA	20.94	30.88
41	18.32	16.44	17.43	17.28	20.19	22.92	31.17	29.20		12	NA	NA	NA	NA	NA	NA	NA	NA		31	NA	NA	NA	NA	NA	NA	21.83	29.10
57	34.48	37.93	33.18	35.36	37.70	37.98	31.17	29.20		13	NA	NA	NA	NA	NA	NA	NA	NA		35	NA	NA	NA	NA	NA	NA	33.61	29.26
68	27.24	20.94	33.2	35.25	32.36	39.09	32.59	24.59		15	NA	NA	NA	NA	NA	NA	NA	NA		36	NA	NA	NA	NA	NA	NA	28.87	26.73
69	39.54	36.69	31.69	31.55	31.17	33.56	25.86	24.05		32	NA	NA	NA	NA	NA	NA	NA	NA		37	NA	NA	NA	NA	NA	NA	25.98	29.15
59	23.80	20.50	31.41	37.15	33.61	35.62	22.00	26.35		33	NA	NA	NA	NA	NA	NA	NA	NA		38	NA	NA	NA	NA	NA	NA	30.70	29.33
61	28.52	27.22	30.76	30.09	28.87	30.01	20.50	30.06		40	NA	NA	NA	NA	NA	NA	NA	NA		58	NA	NA	NA	NA	NA	NA	28.43	26.27
62	22.07	20.56	31.64	28.40	25.98	28.63	21.25	27.97		42	NA	NA	NA	NA	NA	NA	NA	NA		64	NA	NA	NA	NA	NA	NA	30.63	27.43
63	22.90	21.26	30.49	33.90	30.70	34.01	17.04	27.10		43	NA	NA	NA	NA	NA	NA	NA	NA		75	NA	NA	NA	NA	NA	NA	22.00	26.35
65	23.64	22.20	31.70	29.28	28.03	36.17	17.87	25.15		44	NA	NA	NA	NA	NA	NA	NA	NA		76	NA	NA	NA	NA	NA	NA	29.55	22.47
71	24.77	21.51	22.24	22.83	22.00	22.71	36.04	25.41		45	NA	NA	NA	NA	NA	NA	NA	NA		77	NA	NA	NA	NA	NA	NA	20.50	30.06
78	31.66	33.20	29.12	28.52	27.22	30.60	21.25	27.97		46	NA	NA	NA	NA	NA	NA	NA	NA		94	NA	NA	NA	NA	NA	NA	35.44	23.48
79	28.43	25.90	23.63	22.07	20.56	25.16	27.57	29.80		47	NA	NA	NA	NA	NA	NA	NA	NA		82	NA	NA	NA	NA	NA	NA	34.77	26.50
80	30.07	26.63	26.35	22.90	21.26	25.41	21.29	28.10		48	NA	NA	NA	NA	NA	NA	NA	NA		113	NA	NA	NA	NA	NA	NA	33.80	29.96
73	27.41	28.18	23.24	23.80	20.50	26.39	31.17	29.20		49	NA	NA	NA	NA	NA	NA	NA	NA		115	NA	NA	NA	NA	NA	NA	22.91	30.02
74	27.90	25.05	23.87	22.60	21.25	23.01	28.43	26.27		50	NA	NA	NA	NA	NA	NA	NA	NA		116	NA	NA	NA	NA	NA	NA	25.43	29.19
90	29.01	28.95	25.46	24.05	21.45	25.65	28.96	26.74		51	NA	NA	NA	NA	NA	NA	NA	NA		120	NA	NA	NA	NA	NA	NA	20.11	25.66
92	27.03	27.99	22.96	24.39	20.01	25.30	23.19	24.27		52	NA	NA	NA	NA	NA	NA	NA	NA		149	NA	NA	NA	NA	NA	34.81	34.10	31.22
105	24.15	22.40	22.17	22.64	22.04	32.29	28.43	26.27		53	NA	NA	NA	NA	NA	NA	NA	NA		14	39.47	NA	31.69	33.47	34.13	22.5	30.51	28.34
106	28.49	29.46	27.08	31.43	28.67	37.32	21.25	27.97		54	NA	NA	NA	NA	NA	NA	NA	NA		19	NA	NA	35.25	36.18	NA	36.92	17.87	25.15
110	28.19	25.13	24.35	32.11	28.40	37.59	36.58	39.34		55	NA	NA	NA	NA	NA	NA	NA	NA		24	NA	NA	36.94	NA	37.60	37.96	30.51	28.34
117	28.13	28.75	25.42	24.27	21.34	21.53	28.40	29.02		83	NA	NA	NA	NA	NA	NA	NA	NA		81	NA	NA	36.50	NA	34.06	39.19	21.50	28.15
118	37.14	35.42	27.6	29.05	26.66	24.39	33.15	27.20		84	NA	NA	NA	NA	NA	NA	NA	NA		91	NA	NA	36.80	NA	35.73	36.98	35.92	39.18
119	35.23	29.36	27.56	30.54	30.42	40.58	26.03	26.30		85	NA	NA	NA	NA	NA	NA	NA	NA		70	NA	35.88	32.07	29.72	28.43	31.36	35.18	26.46
126	31.88	30.33	29.52	26.76	26.13	26.58	26.46	29.03		86	NA	NA	NA	NA	NA	NA	NA	NA		20	36.68	NA	31.37	34.65	32.05	37.27	38.16	37.55
127	33.14	33.00	29.27	28.49	25.44	28.56	30.49	33.56		87	NA	NA	NA	NA	NA	NA	NA	NA		21	36.69	NA	30.12	NA	33.31	21.3	32.11	26.83
128	29.46	28.77	26.17	22.58	19.65	22.64	24.46	26.81		88	NA	NA	NA	NA	NA	NA	NA	NA		23	39.66	NA	34.71	36.03	36.30	38.26	16.72	30.18
112	22.39	20.75	19.69	19.05	17.62	22.01	30.38	29.57		89	NA	NA	NA	NA	NA	NA	NA	NA		27	41.00	NA	34.83	NA	39.86	35.56	28.96	26.74
114	25	21.39	20.87	22.79	22.63	22.62	26.85	31.24		95	NA	NA	NA	NA	NA	NA	NA	NA		93	40.96	NA	32.69	34.97	32.91	37.59	20.30	28.72
122	29.70	28.44	27.15	25.89	23.89	26.02	25.44	25.98		96	NA	NA	NA	NA	NA	NA	NA	NA		108	NA	NA	36.42	NA	36.22	38.44	20.01	27.56
133	34.07	33.60	31.09	32.37	30.38	32.33	32.41	35.21		97	NA	NA	NA	NA	NA	NA	NA	NA		123	NA	NA	35.65	34.07	33.60	35.10	35.45	37.15
134	34.67	34.81	33.64	35.98	33.80	36.19	34.76	37.22		98	NA	NA	NA	NA	NA	NA	NA	NA		150	NA	22.91	34.99	37.94	35.61	27.35	36.02	29.03
135	28.39	27.35	29.85	28.03	26.85	30.05	29.45	32.49		99	NA	NA	NA	NA	NA	NA	NA	NA		151	NA	25.43	29.41	36.96	33.04	26.13	27.71	26.38
136	26.76	26.13	28.64	25.15	22.91	27.67	27.07	30.26		100	NA	NA	NA	NA	NA	NA	NA	NA		152	NA	19.39	34.74	34.63	30.85	19.39	25.29	26.61
139	25.87	22.69	20.72	20.83	19.39	23.53	23.90	25.52		101	NA	NA	NA	NA	NA	NA	NA	NA		124	25.11	21.71	34.83	34.67	34.81	37.35	36.56	NA
140	33.17	30.39	28.55	26.18	24.60	27.55	28.05	31.32		102	NA	NA	NA	NA	NA	NA	NA	NA		56	39.4	NA	36.87	NA	NA	NA	29.08	26.63
145	26.85	24.43	22.57	26.08	24.49	27.45	28.04	30.33		103	NA	NA	NA	NA	NA	NA	NA	NA		60	22.60	21.25	34.39	NA	NA	NA	29.55	22.47
146	32.67	28.37	27.6	29.86	28.57	33.68	33.24	35.81		104	NA	NA	NA	NA	NA	NA	NA	NA		67	27.24	20.94	34.98	NA	NA	NA	32.02	25.47
148	32.01	31.15	28.55	25.09	23.05	33.60	24.38	26.01		109	NA	NA	NA	NA	NA	NA	NA	NA		72	25.11	21.84	37.59	37.16	29.55	NA	32.36	28.05
										138	NA	NA	NA	NA	NA	NA	NA	NA		107	36.89	34.11	31.09	32.45	30.01	NA	27.57	29.80
										141	NA	NA	NA	NA	NA	NA	NA	NA		66	32.91	30.62	36.04	NA	34.93	NA	34.62	29.01
										142	NA	NA	NA	NA	NA	NA	NA	NA
										143	NA	NA	NA	NA	NA	NA	NA	NA
										144	NA	NA	NA	NA	NA	NA	NA	NA
										147	NA	NA	NA	NA	NA	NA	NA	NA
										132	NA	NA	NA	NA	NA	NA	NA	NA
										130	NA	NA	NA	NA	NA	NA	NA	NA
										121	NA	NA	NA	NA	NA	NA	NA	NA
Abbreviations: GeneFinderTM COVID-19 Plus RealAmp (In Vitro diagnostic): GF-TM, One-Step Real-Time RT-PCR (Vitro Master diagnostica): O-S RT-qPCR, Berlinmodified protocol: BM and gold standard Berlin protocol (Berlin Charite Probe One-Step RT-qPCR Kit, New England Biolabs): BR.
